# Supplementary material for: The regulon of Brucella abortus two-component system BvrR/BvrS reveals the coordination of metabolic pathways required for intracellular life
Source: PubMed Central journal article supplement (PMC9491525; doi:10.1371/journal.pone.0274397), 2022-09-21

# S1\_raw\_images

**Fig 1B, samples 1,2,11,12,15&16, photographed gel:**

|          |          |           |              |   |          |          |       |
|----------|----------|-----------|--------------|---|----------|----------|-------|
| revtrans | revtrans | revtrRSin | revtrbvrS    |   | revtrans | revtrans |       |
| 20752076 | 20762077 | tergen    | 2067intergen |   | 20792080 | 20802081 |       |
| 2.3-2.5  | 1.3-1.5  | 2.3-2.5   | 2.3-2.5      |   | 1.3-1.5  | 2.3-2.5  |       |
|          | 11       | 12        | 1            | 2 |          | 15       | 16    |
| M        | a b c    | a b c     | a b c        | M | a b c    | a b c    | X X X |

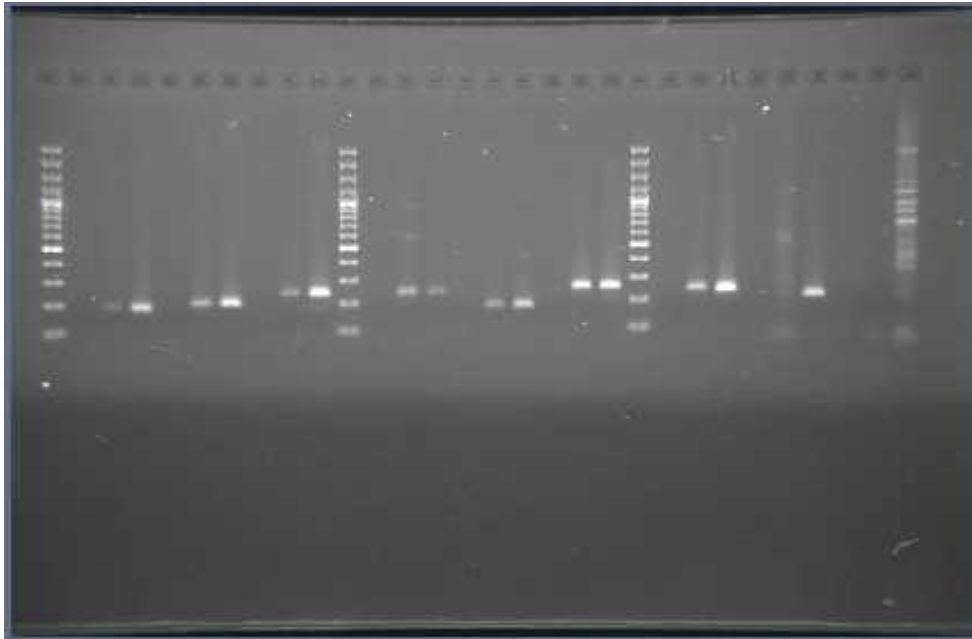

**Fig 1B, samples 6,3&7, photographed gel:**

|          |          |          |   |       |         |
|----------|----------|----------|---|-------|---------|
| revtrans | revtrans | revtrans |   |       |         |
| 20702071 | 20672068 | 20712072 |   |       |         |
| 2.3-2.5  | 2.3-2.5  | 2.3-2.5  |   |       |         |
|          | 6        | 3        | 7 |       |         |
| M        | a b c    | a b c    | M | a b c | X X X X |

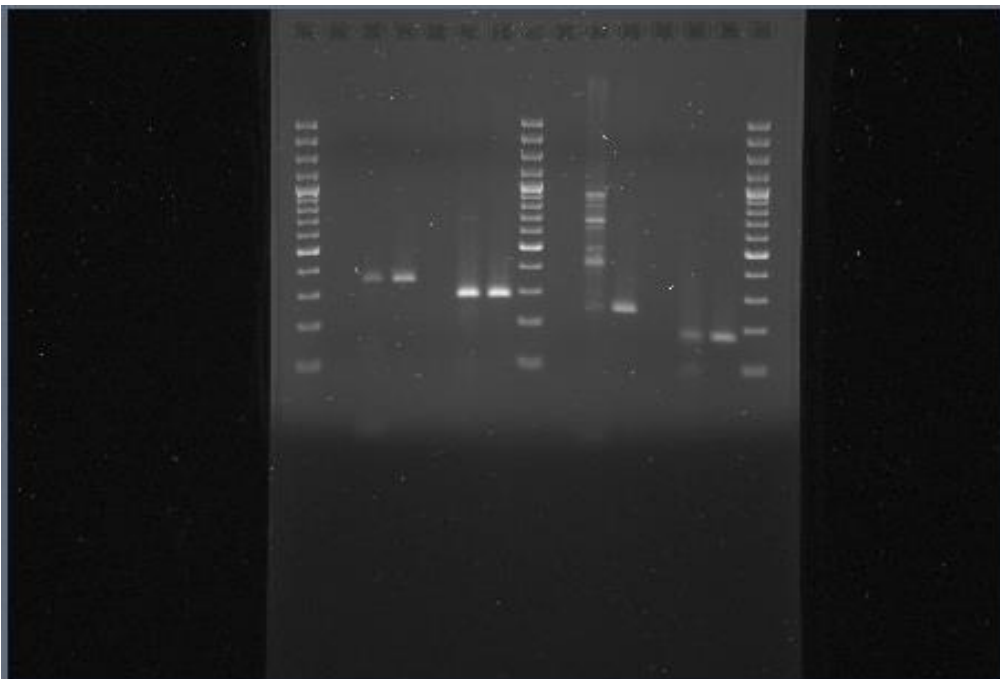

**Fig 1B, samples 8,9,4&5, photographed gel:**

|          |          |          |          |
|----------|----------|----------|----------|
| revtrans | revtrans | revtrans | revtrans |
| 20722073 | 20732074 | 20682069 | 20692070 |
| 2.3-2.5  | .3-.5    | 1.3-1.5  | 1.3-1.5  |
| 8        | 9        | 4        | 5        |

M a b c a b c M a b c a b c M

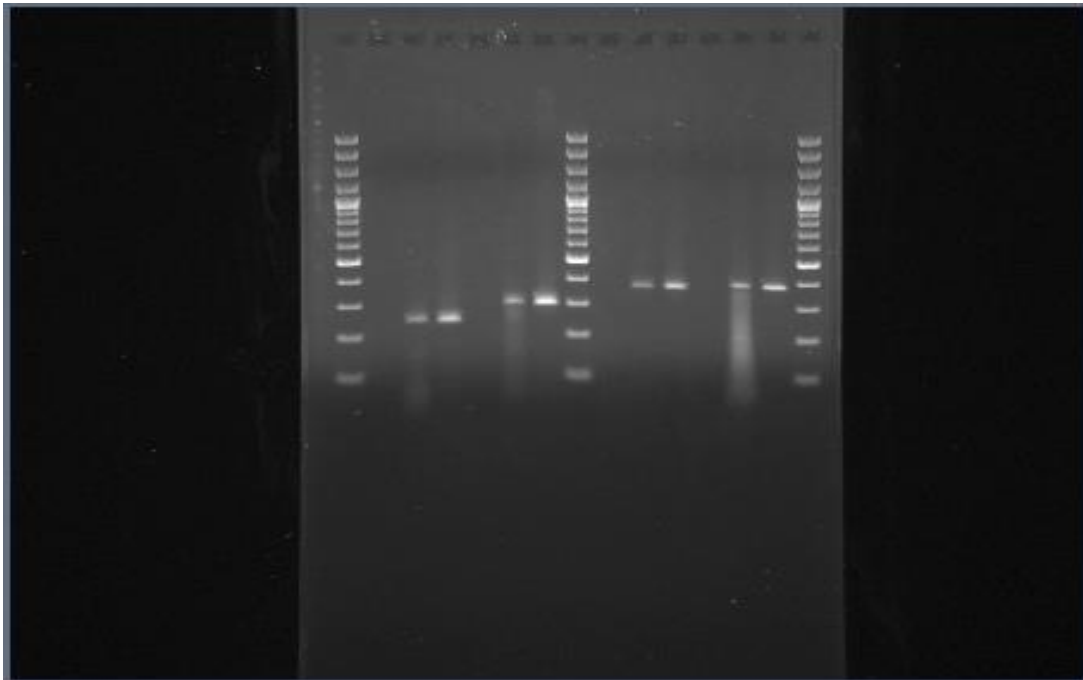

**Fig 1B, sample 10, photographed gel:**

|          |
|----------|
| revtrans |
| 20742075 |
| 1.3-1.5  |
| 10       |

M a b c

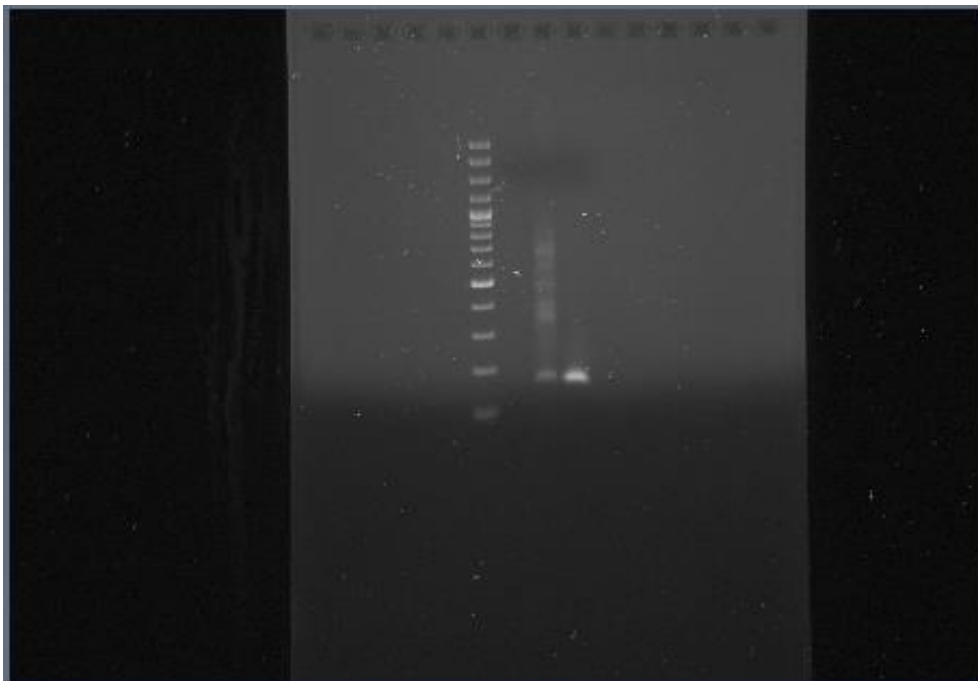

**Fig 1B, samples 13&14, photographed gel:**

revtrans      revtrans  
 20772078    20782079  
 1.3-1.5      .3-.5  
                  13                    14  
                  / \                    / \  
 M   a   b   c                    a   b   c   M

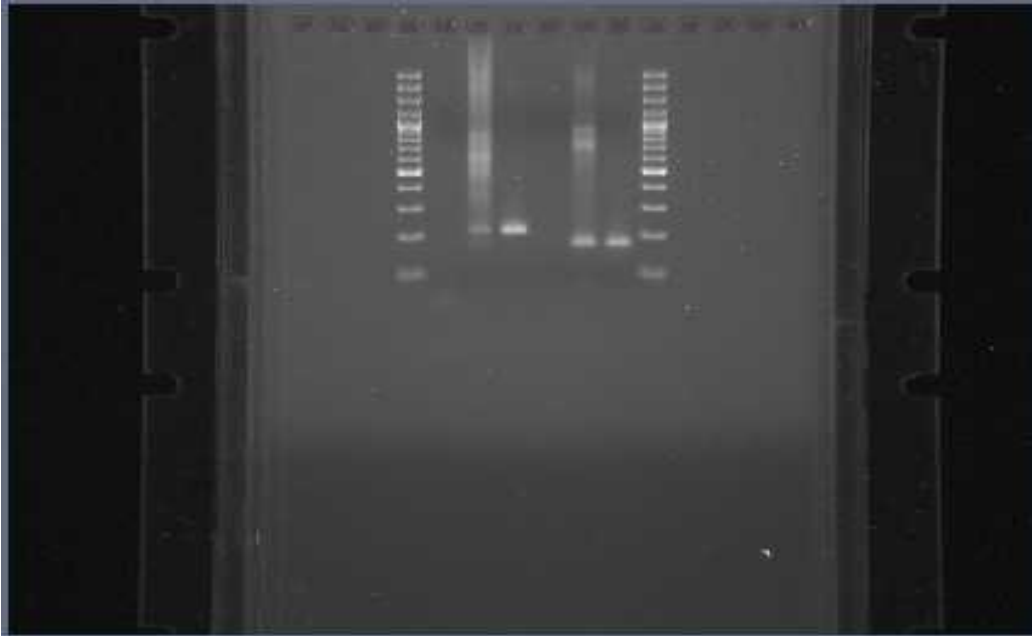

**Fig 4A, gel #1, photographed film, probe *tamA*:**

|                 |   |      |      |      |      |      |      |      |   |   |
|-----------------|---|------|------|------|------|------|------|------|---|---|
| [BvrR] $\mu$ M: | - | 0.18 | 0.37 | 0.74 | 1.11 | 1.48 | 1.85 | 2.22 | X | X |
|-----------------|---|------|------|------|------|------|------|------|---|---|

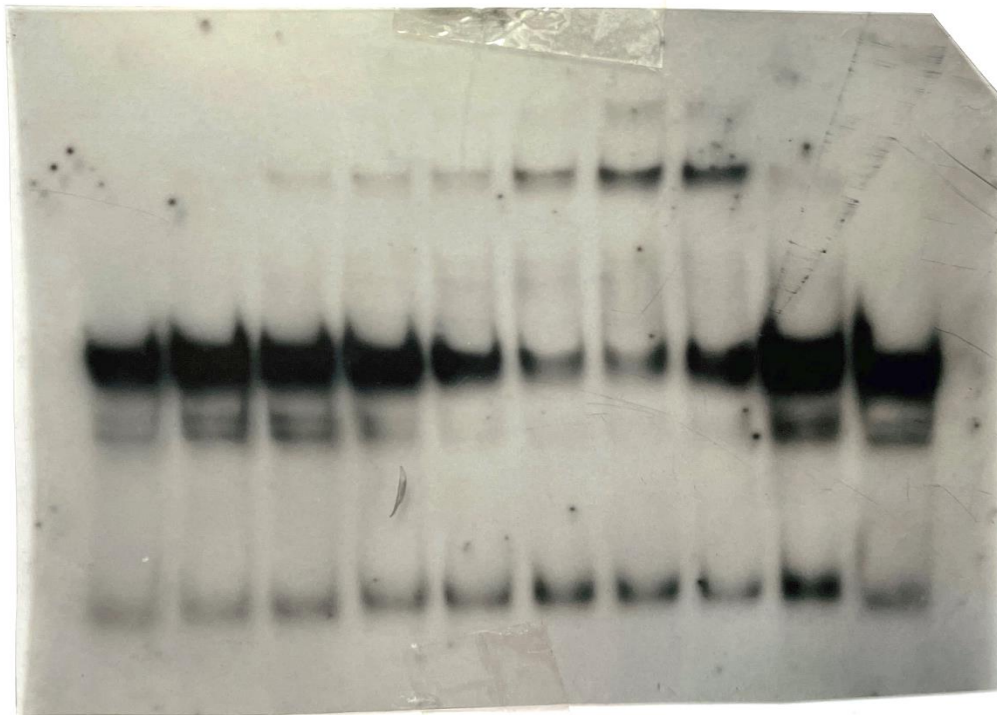

**Fig 4A, gel #2, photographed film, probe *pckA*:**

|                 |   |      |      |      |      |      |      |      |   |
|-----------------|---|------|------|------|------|------|------|------|---|
| [BvrR] $\mu$ M: | - | 0.18 | 0.37 | 0.74 | 1.11 | 1.48 | 1.85 | 2.22 | X |
|-----------------|---|------|------|------|------|------|------|------|---|

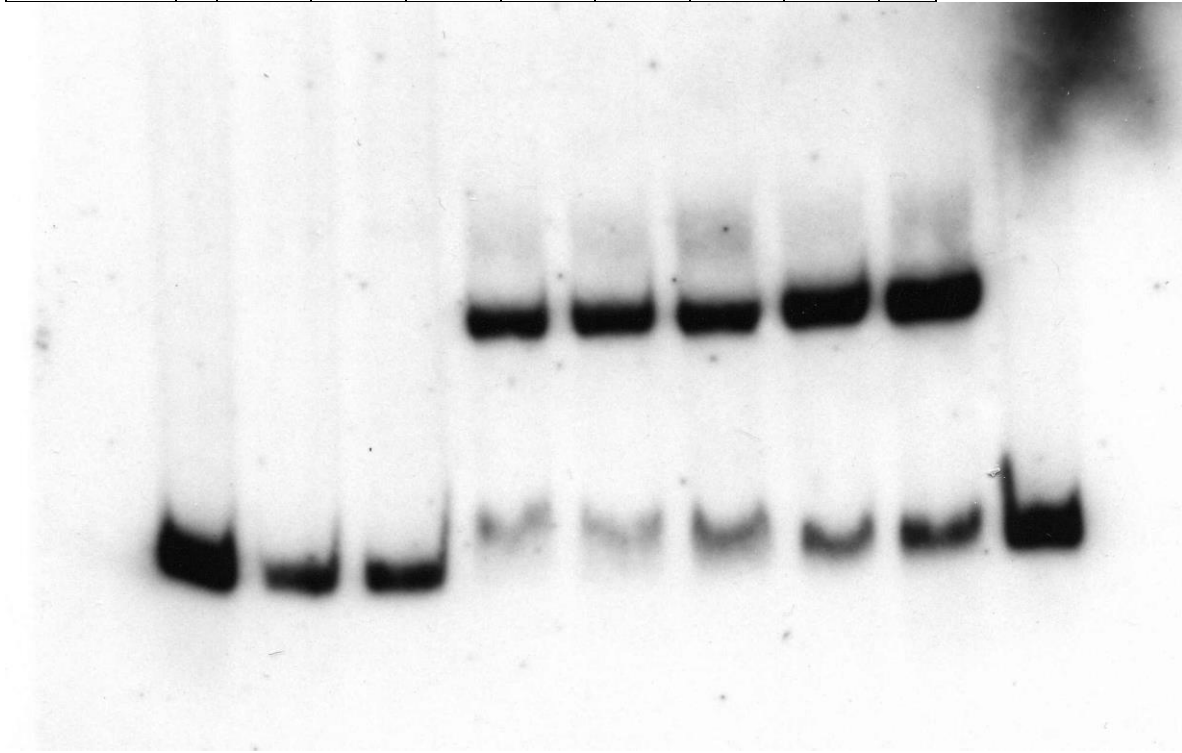

**Fig 4A, gel #3, photographed film, probe *bvrR*:**

|                 |   |      |      |          |      |      |          |      |   |
|-----------------|---|------|------|----------|------|------|----------|------|---|
| [BvrR] $\mu$ M: | - | 0.18 | 0.37 | 0.7<br>4 | 1.11 | 1.48 | 1.8<br>5 | 2.22 | X |
|-----------------|---|------|------|----------|------|------|----------|------|---|

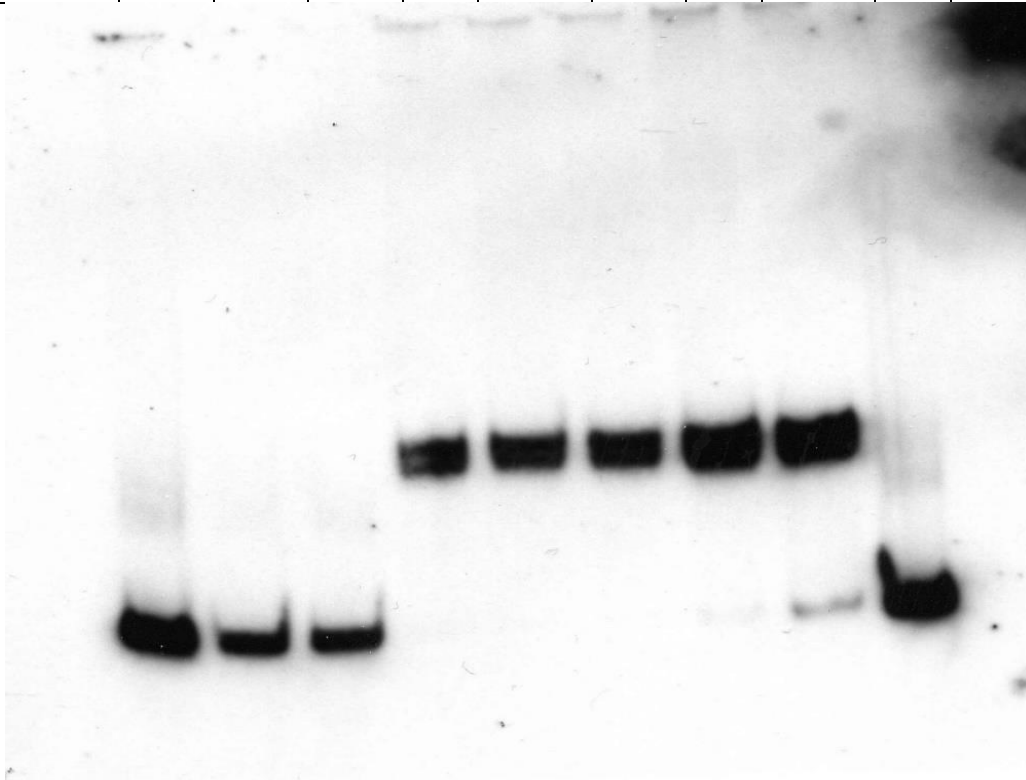

**Fig 4A, gel #4, photographed film, probe *omp25*:**

|                 |   |      |      |          |      |          |      |     |   |   |
|-----------------|---|------|------|----------|------|----------|------|-----|---|---|
| [BvrR] $\mu$ M: | - | 0.18 | 0.37 | 0.7<br>4 | 1.78 | 2.2<br>2 | 2.96 | 3.7 | X | X |
|-----------------|---|------|------|----------|------|----------|------|-----|---|---|

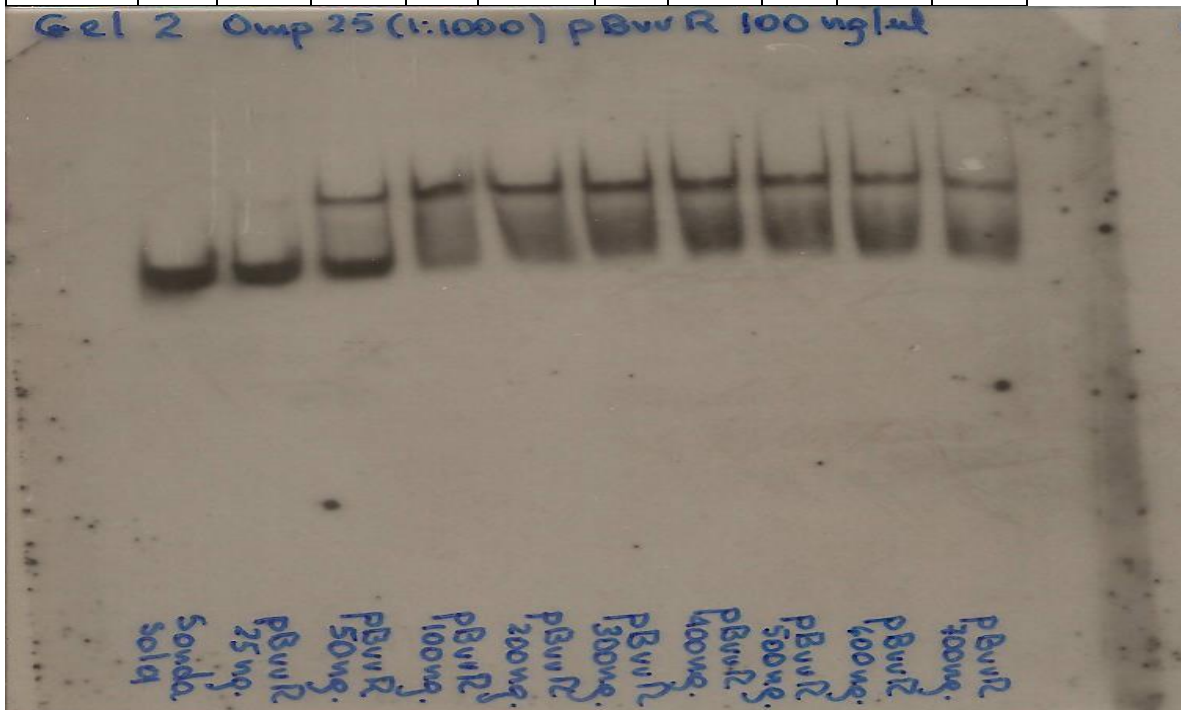

**Fig 4A, gel #5, photographed film, probe *virB*:**

|                 |   |      |      |      |      |   |   |   |   |   |
|-----------------|---|------|------|------|------|---|---|---|---|---|
| [BvrR] $\mu$ M: | - | 1.11 | 1.48 | 1.85 | 2.22 | X | X | X | X | X |
|-----------------|---|------|------|------|------|---|---|---|---|---|

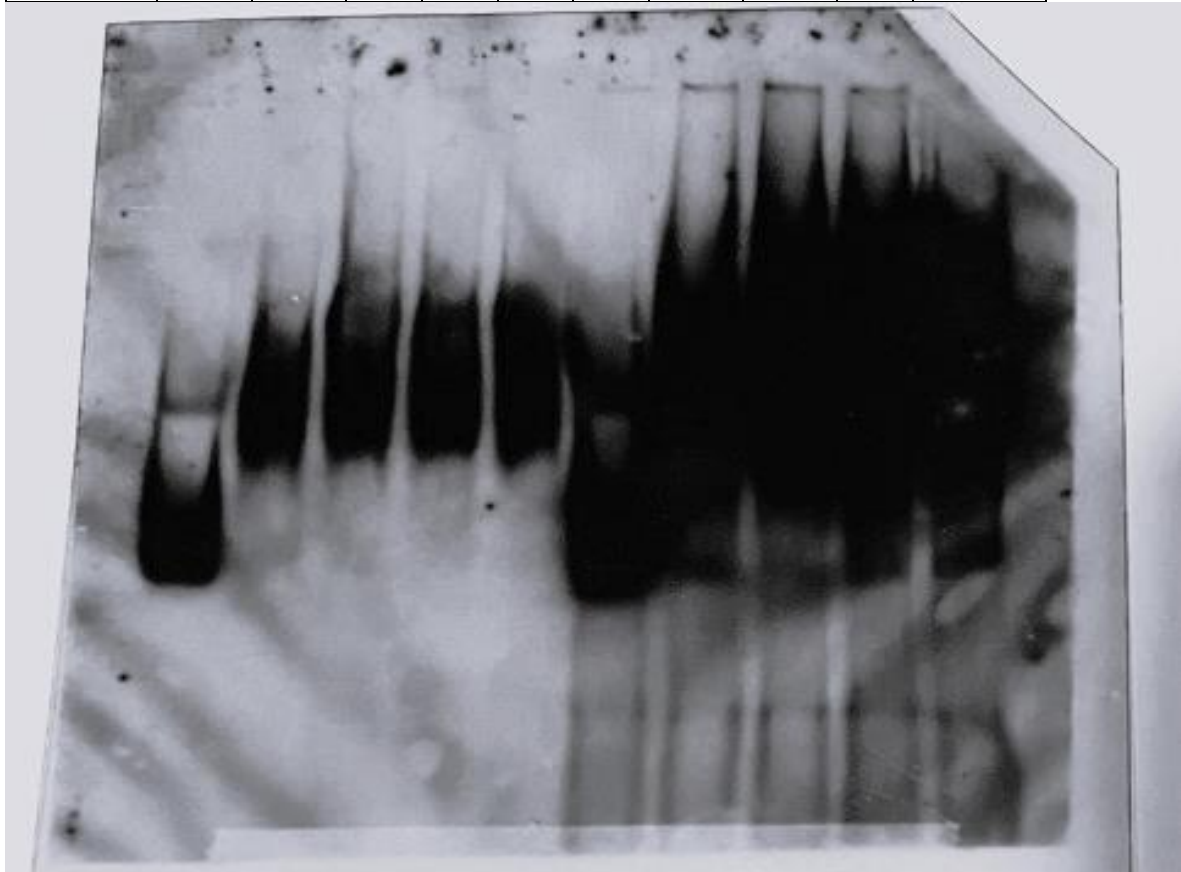

Fig 4A, gel #6, photographed film, probe *rplL*:

|                 |   |   |   |      |      |      |      |      |   |   |
|-----------------|---|---|---|------|------|------|------|------|---|---|
| [BvrR] $\mu$ M: | X | X | - | 0.74 | 1.11 | 1.48 | 1.85 | 2.22 | X | X |
|-----------------|---|---|---|------|------|------|------|------|---|---|

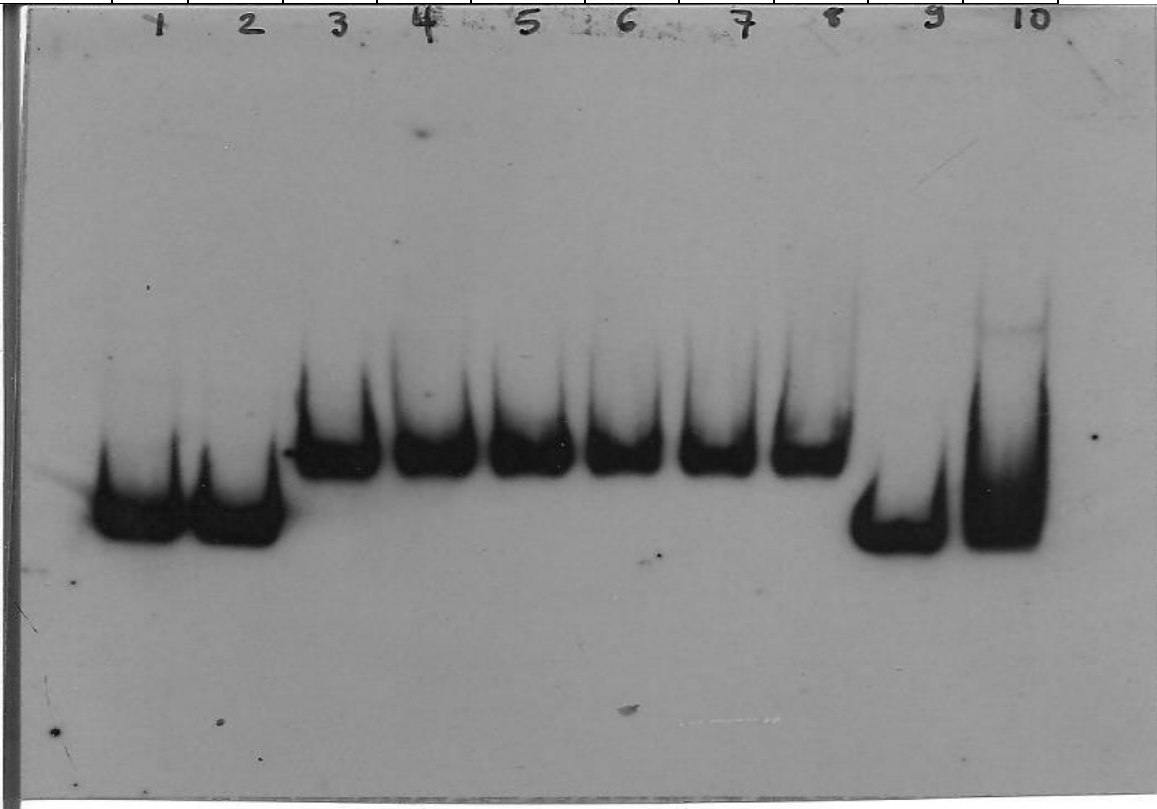

Fig 4A, gel #7, photographed film, probe *dhb*:

|                 |   |      |      |      |      |      |      |      |   |   |
|-----------------|---|------|------|------|------|------|------|------|---|---|
| [BvrR] $\mu$ M: | - | 0.18 | 0.37 | 0.55 | 0.74 | 0.92 | 1.11 | 1.48 | X | X |
|-----------------|---|------|------|------|------|------|------|------|---|---|

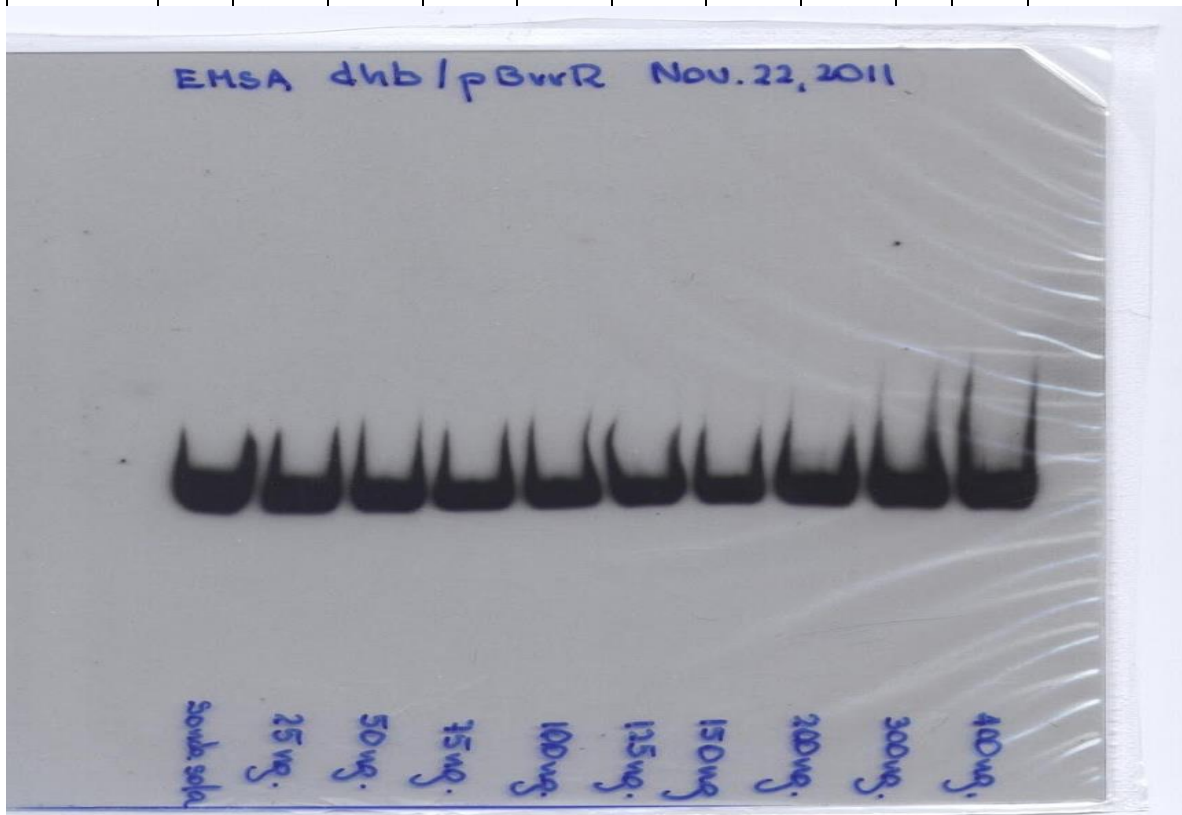

Fig 4B, gel #1, photographed film, [BvrR] = 0.6  $\mu$ M, probe *tamA*, competitor *tamA*:

|   |    |      |       |       |       |       |   |   |   |
|---|----|------|-------|-------|-------|-------|---|---|---|
| - | 0x | 250x | 1000x | 2000x | 4000x | 8000x | X | X | X |
|---|----|------|-------|-------|-------|-------|---|---|---|

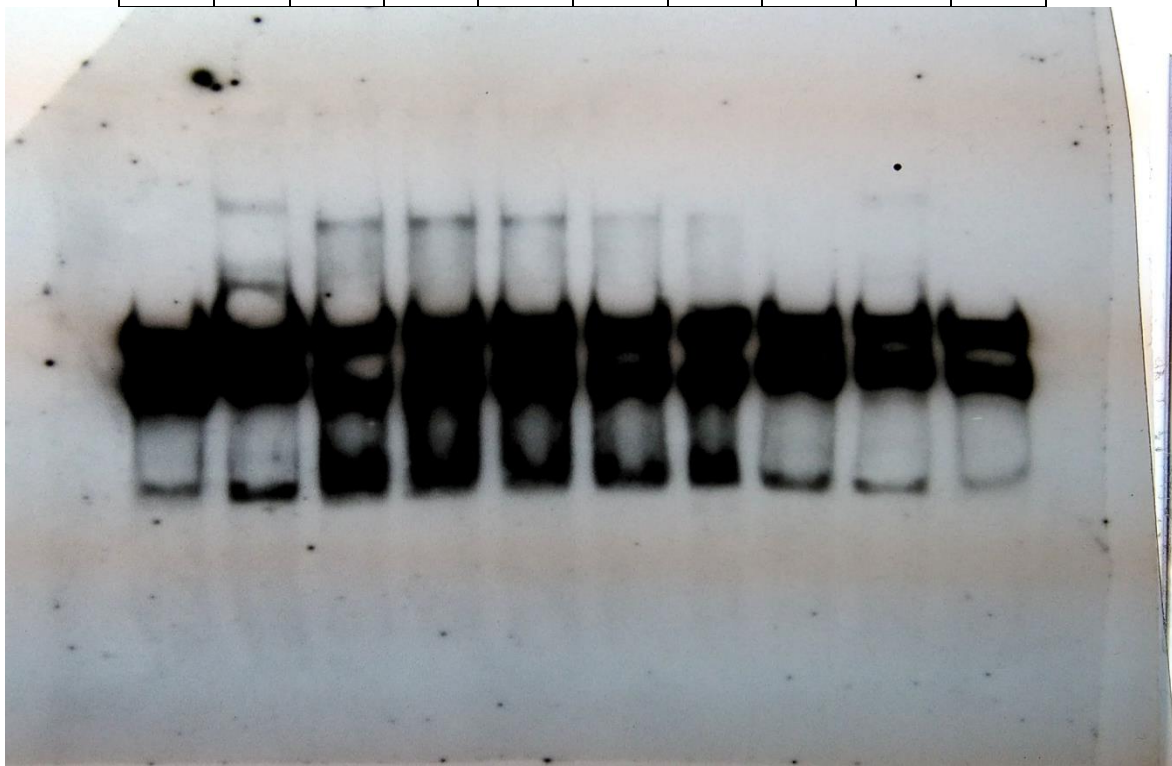

Fig 4B, gel #2, photographed film, [BvrR] = 0.6  $\mu$ M, probe *tamA*, competitor *rplL*:

|   |    |      |       |       |       |       |   |   |   |
|---|----|------|-------|-------|-------|-------|---|---|---|
| - | 0x | 250x | 1000x | 2000x | 4000x | 8000x | X | X | X |
|---|----|------|-------|-------|-------|-------|---|---|---|

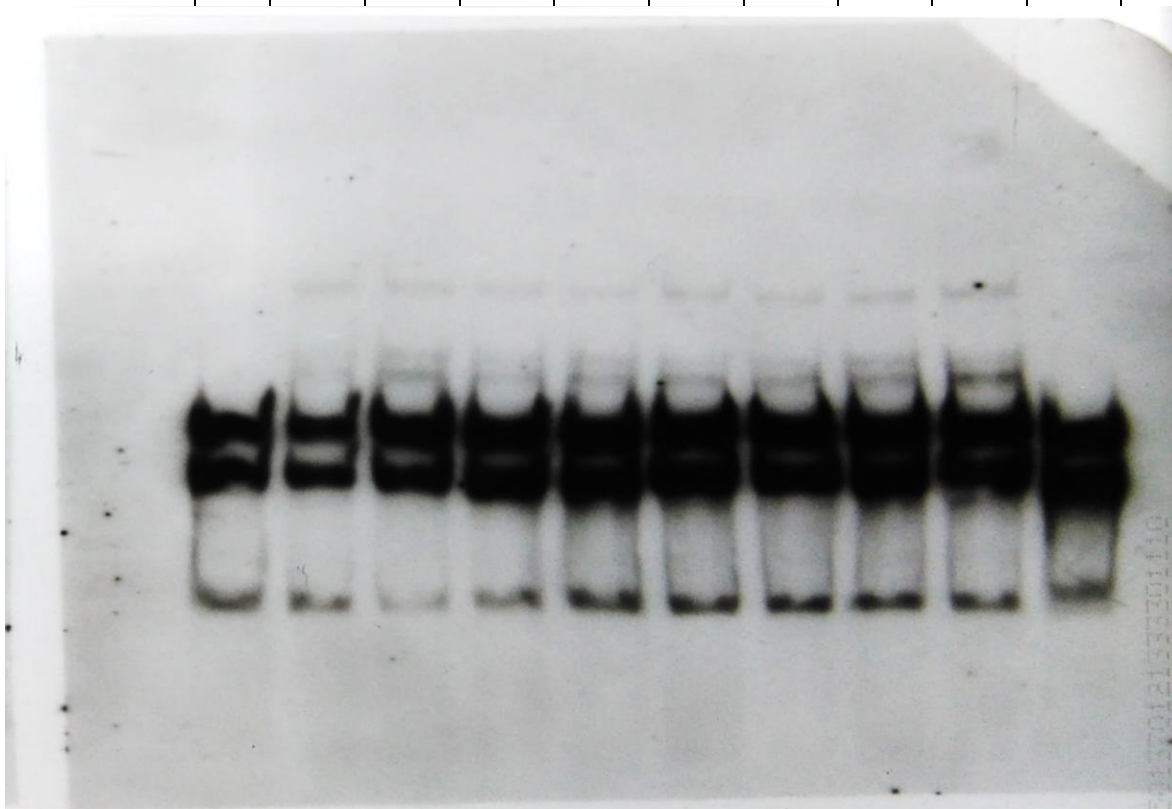

Fig 4B, gel #3, photographed film, [BvrR] = 0.6  $\mu$ M, probe *omp25*, competitor *omp25*:

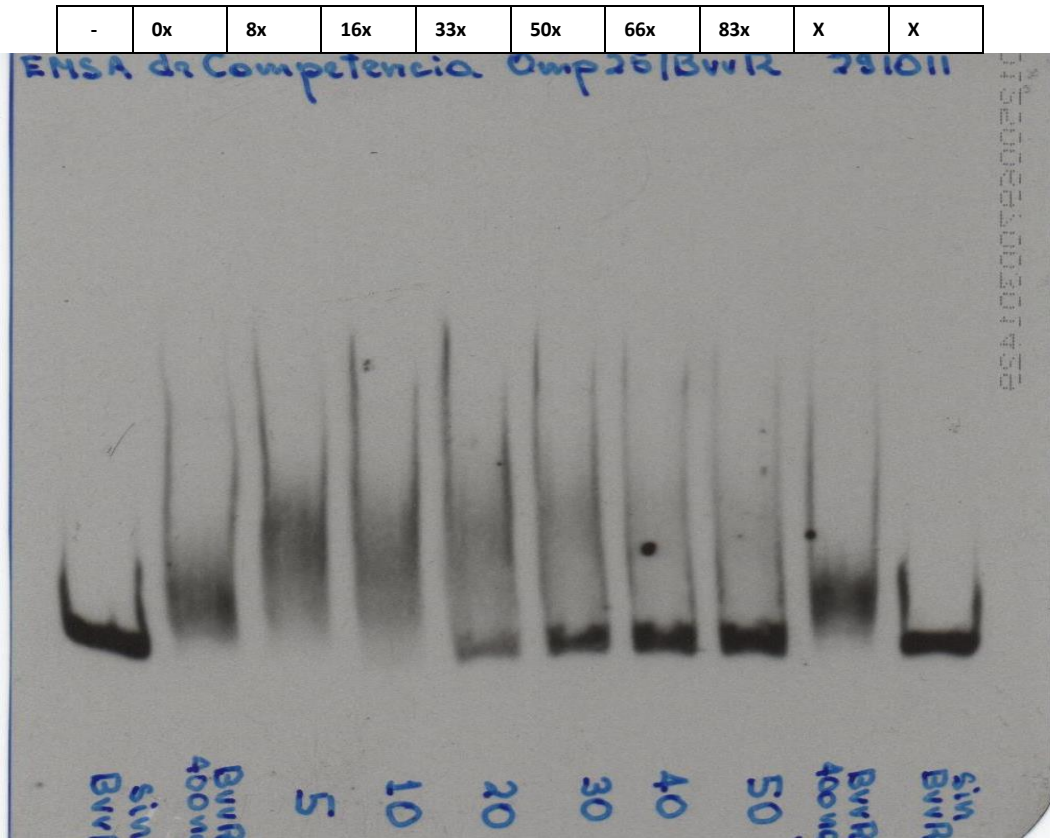

Fig 4B, gel #4, photographed film [BvrR] = 0.6  $\mu$ M, probe *omp25*, competitor *dhb*:

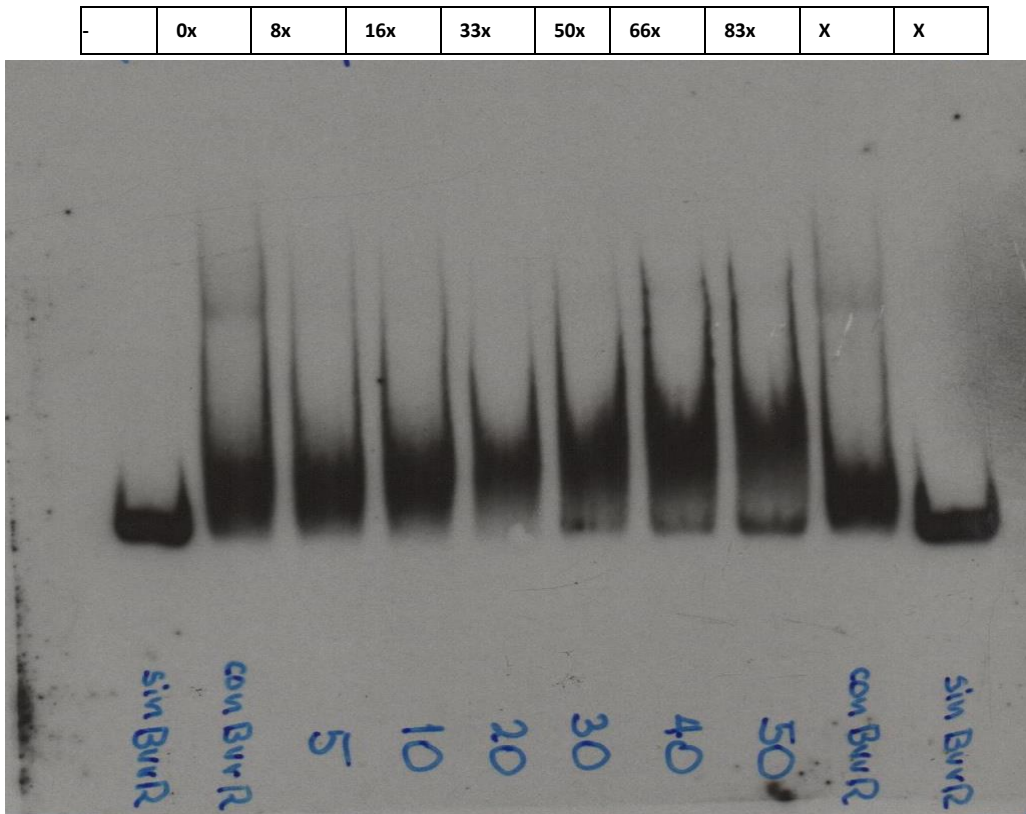



Fig 4B, gel #5, photographed film, [BvrR] = 0.6  $\mu$ M, probe *virB1*, competitor *virB1*:

|   |    |     |      |      |       |       |       |   |   |
|---|----|-----|------|------|-------|-------|-------|---|---|
| - | 0x | 25x | 100x | 500x | 1000x | 1500x | 2000x | X | X |
|---|----|-----|------|------|-------|-------|-------|---|---|

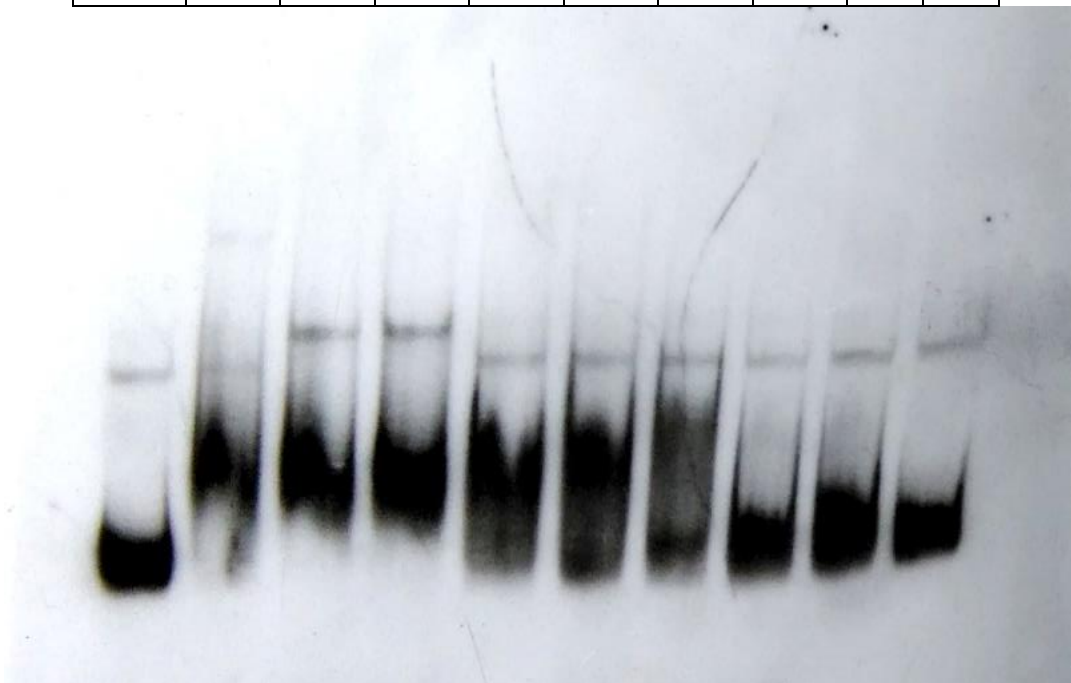

Fig 4B, gel #6, photographed film, [BvrR] = 0.6  $\mu$ M, probe *virB1*, competitor *rplL*:

|     |      |       |       |       |    |   |   |   |
|-----|------|-------|-------|-------|----|---|---|---|
| 25x | 100x | 1000x | 1500x | 2000x | 0x | - | X | X |
|-----|------|-------|-------|-------|----|---|---|---|

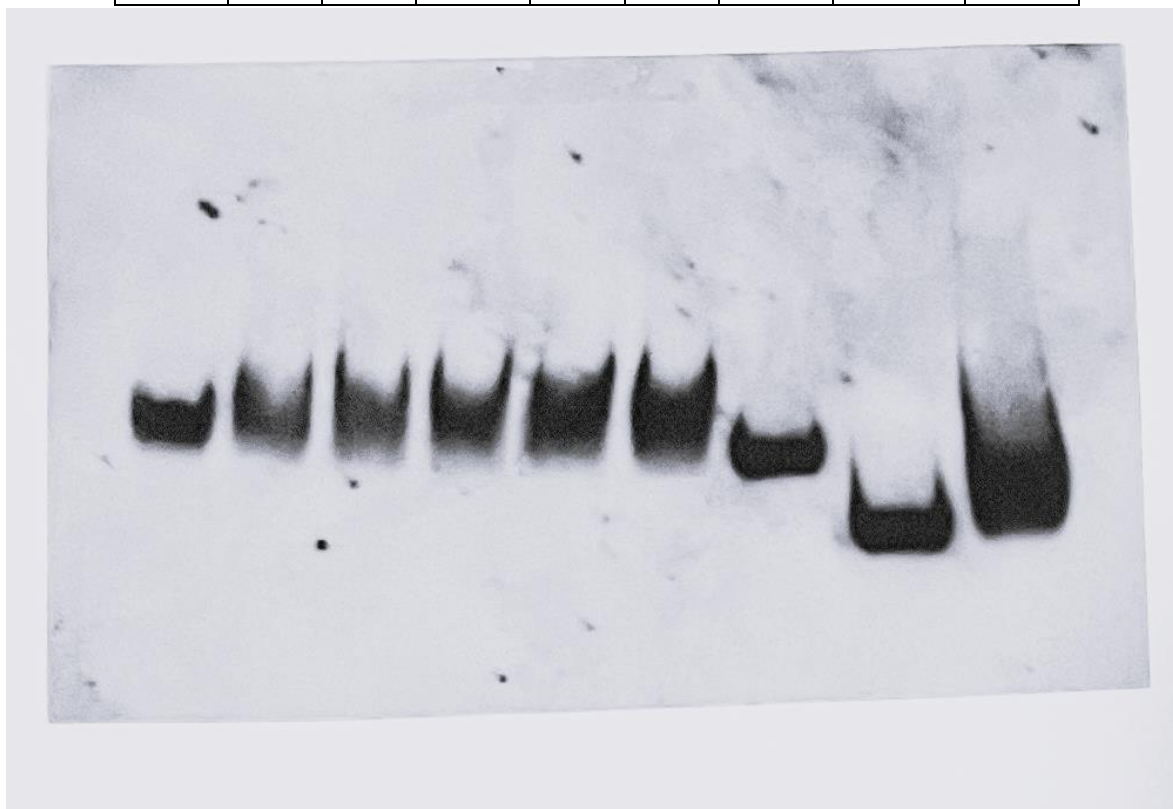

**Fig 5C, gel #1, photographed film, probe *virB1* oligo 10:**

|                 |   |     |     |     |     |     |     |   |   |   |
|-----------------|---|-----|-----|-----|-----|-----|-----|---|---|---|
| [BvrR] $\mu$ M: | X | 0.4 | 0.8 | 1.2 | 1.6 | 2.2 | 2.6 | - | X | X |
|-----------------|---|-----|-----|-----|-----|-----|-----|---|---|---|

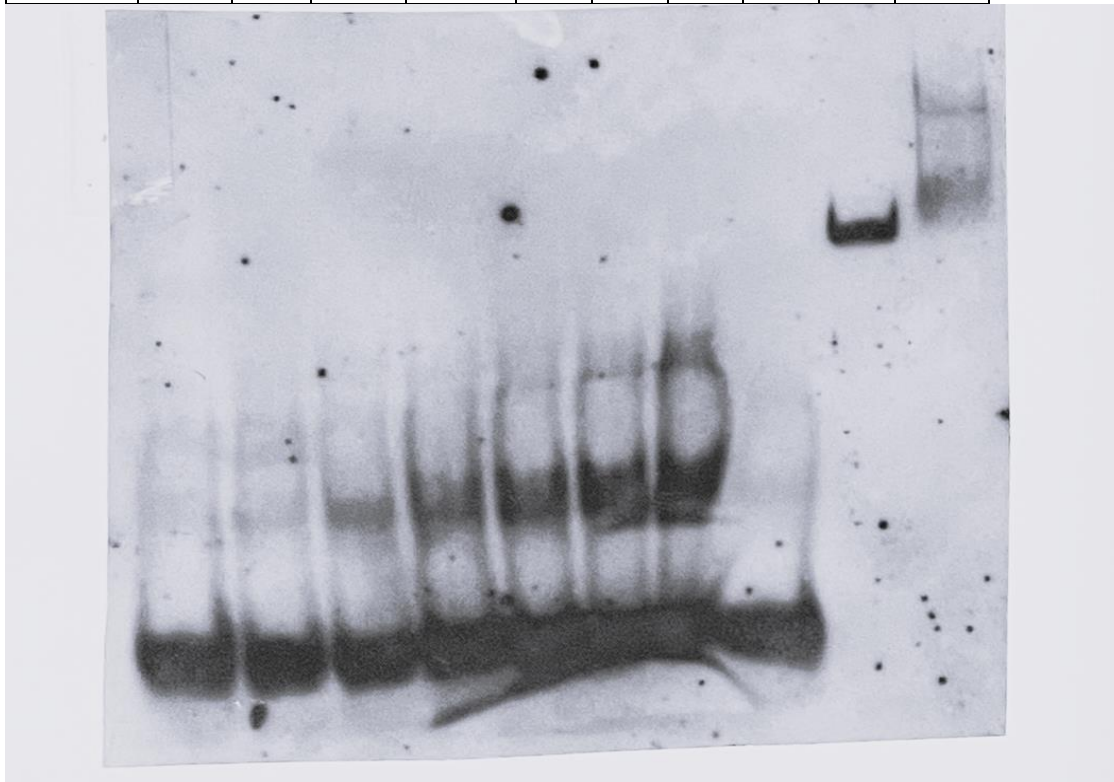

**Fig 5C, gel #2, photographed film, probe *virB1* oligo 5:**

|                 |   |     |     |     |     |     |     |   |   |   |
|-----------------|---|-----|-----|-----|-----|-----|-----|---|---|---|
| [BvrR] $\mu$ M: | X | 0.4 | 0.8 | 1.2 | 1.6 | 2.2 | 2.6 | - | X | X |
|-----------------|---|-----|-----|-----|-----|-----|-----|---|---|---|

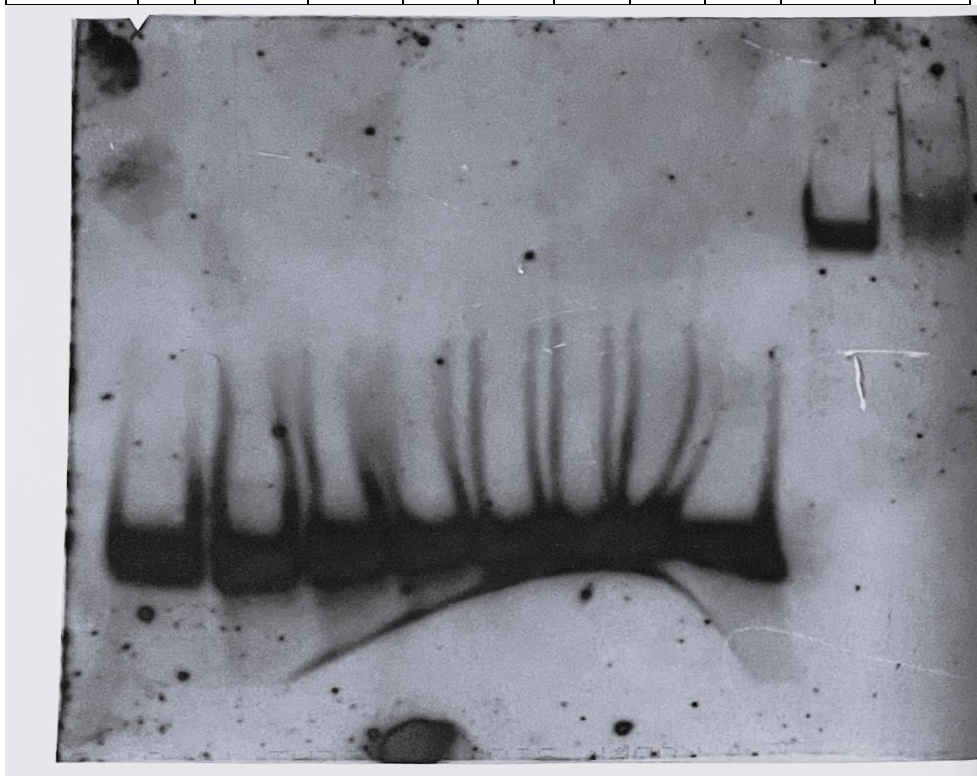

Supplement: pone.0274397.s001.pdf [file pone.0274397.s001.pdf]
