# Supplementary material for: The regulon of Brucella abortus two-component system BvrR/BvrS reveals the coordination of metabolic pathways required for intracellular life
Source: PubMed Central journal article supplement (PMC9491525; doi:10.1371/journal.pone.0274397), 2022-09-21
Supplement: pone.0274397.s002.pdf [file pone.0274397.s002.pdf]

**Supplementary Table 1** List of oligonucleotides used in this study.

| <b>Name</b>   | <b>Sequence (5'-3')</b>                            |
|---------------|----------------------------------------------------|
| bruAb1.0048.3 | CTGGATACAGGCGTTGAG                                 |
| bruAb1.0048.5 | CTGTTACTCCAAATCATACG                               |
| 3-200pck3     | GCGGCCTTATTGTGGATGC                                |
| 3-200pck5     | GGTAAATGTACGCCAGGGTTG                              |
| 3-200bvrR3    | CACTGATTCGCTTGAGGACG                               |
| 3-200bvrR5    | CGTCTGCGTTGCCGAAGC                                 |
| omp25 For     | GCCATCTTCTCGACAGATTATC                             |
| omp25 Rev     | GTCTCTCGTAATCGTCTCGG                               |
| pvirdownI     | GATCGTCTCCTTCTCAGAG                                |
| pvu229        | CGCATACCACTTGTATATAAG                              |
| L7L12 For     | GGCTGATCTCGCAAAGAT                                 |
| L7L12 Rev     | CCAGGTCCTTGGCTTCCTTGAG                             |
| dhbprom3      | CGGCATCCAGCCATCTGCAAAA                             |
| dhbprom5      | ATCACCTCACGCATGCCGCT                               |
| 46.00virBO    | TTAGAAAATTCTTTTTTAACAAAATCTTATATACAA<br>GTGGTATGCG |
| 46.00virBOR   | CGCATACCACTTGTATATAAGATTTTGTAAAAAA<br>GAATTTTCTAA  |
| 66.26virBO    | GGGCACTTGTATTGGTTCTATTAGAAAATTCTTTTT<br>TAACA      |

---

|               |                                               |
|---------------|-----------------------------------------------|
| 66.26virBOR   | TGTTAAAAAAGAATTTTCTAATAGAACCAATACAA<br>GTGCCC |
| 86.46virBO    | GACGCCCAGTCAGAATTTTGGGGCACTTGTATTG<br>GTTCTAT |
| 86.46virBOR   | ATAGAACCAATACAAGTGCCCCAAAATTCTGACTG<br>GGCGTC |
| 106.66virBO   | GGGCTATATATTGTGTGAATGACGCCCAGTCAGA<br>ATTTTGG |
| 106.66virBOR  | CCAAAATTCTGACTGGGCGTCATTCACACAATATA<br>TAGCCC |
| 126.86virBO   | GGACAAATATGCTTGTGAGGGGGCTATATATTGT<br>GTGAATG |
| 126.86virBOR  | CATTCACACAATATATAGCCCCCTCACAAGCATAT<br>TTGTCC |
| 146.106virBO  | TGTTGTTTAAGCCGATATATGGACAAATATGCTTG<br>TGAGGG |
| 146.106virBOR | CCCTCACAAGCATATTTGTCCATATATCGGCTTAA<br>ACAACA |
| 166.126virBO  | TATCGGTCATTATTGGGTAGTGTTGTTTAAGCCGA<br>TATATG |
| 166.126virBOR | CATATATCGGCTTAAACAACACTACCCAATAATGA<br>CCGATA |

---

---

|                          |                                               |
|--------------------------|-----------------------------------------------|
| 186.146virBO             | CCTTAATTATAGATCAGCGATATCGGTCATTATTG<br>GGTAGT |
| 186.146virBOR            | ACTACCCAATAATGACCGATATCGCTGATCTATAA<br>TTAAGG |
| 206.166virBO             | ATGGACGATTATTATGATAGCCTTAATTATAGATC<br>AGCGAT |
| 206.166virBOR            | ATCGCTGATCTATAATTAAGGCTATCATAATAATC<br>GTCCAT |
| 226.186virBO             | GATCGTCTCCTTCTCAGAGAATGGACGATTATTAT<br>GATAGC |
| 226.186virBOR            | GCTATCATAATAATCGTCCATTCTCTGAGAAGGAG<br>ACGATC |
| revtrRSintergen1.3       | CGCACCATCGACAGCCACATC                         |
| revtrRSintergen1.5       | CGTTGCCGCCGTGCTCTG                            |
| revtransRSintergen2.3    | GCTCTACGGCGTCGGTTATCG                         |
| revtransRSintergen2.5    | CAAGGGCGACAGAAAGCGGC                          |
| revtrbvrS2067intergen1.3 | CATTCCTATCGAGAATATCGAGC                       |
| revtrbvrS2067intergen1.5 | GTGGTGGCGTGAAGACCG                            |
| revtrbvrS2067intergen2.3 | GTGCCCGCTTTATCGTTGATC                         |
| revtrbvrS2067intergen2.5 | GATGCAGGAGTGTGCGATCATC                        |
| revtr206720681.3         | GCCTGTTCCGCATTCCCTATCG                        |
| revtr206720681.5         | GACAATTTCCAACCGCACTGTG                        |
| revtrans206720682.3      | GTCGGCAAATGGTGATTCCAAT                        |

---

|                      |                             |
|----------------------|-----------------------------|
| revtrans206720682.5  | CCAGAGTAGCAGATGGCACTG       |
| revtrans206820691.3  | CATCCTGAAAGGTGTTGAACG       |
| revtrans206820691.5  | CTGTTCCATATCGTCTTCAGC       |
| revtrans206820692.3  | CTGCTACTCTGGCGGGTGATGCG     |
| revtrans206820692.5  | CTGATACGAACGCTCGACAGCTTGATG |
| revtrans206920701.3  | CCGCAGGAGAATTTGAGACTG       |
| revtrans206920701.5  | GCATTGTCGGGATCATATTCGCC     |
| revtrans206920702.3  | GAGCGTTCGTATCAGCGGTG        |
| revtrans206920702.5  | CCCACCGTCATGCCATCCTTG       |
| revtrans207020711.3  | CAGCAAGGATGGCATGACGGTG      |
| revtrans207020711.5  | CAAATCTTTATACGTGCATATTGCCCG |
| revtrans207020712.3  | CGCTCCAGACGCTTATCGC         |
| revtrans207020712.5  | GTGCTCCAATCCAGGGCAATTC      |
| revtrans207120721.3  | CACTGATCTGCTACTCAAACGC      |
| revtrans207120721.5  | AGCGGCTGCGACTTGC            |
| revtrans207120722.3  | GAAAATCCGCTCCAGAACC         |
| revtrans207120722.5a | GCACCCAGAACCTTCAGCGTC       |
| revtrans207120722.5b | GTCCAGTATTCTTCAAGCGTCTC     |
| revtrans20722073_1.3 | AGGTCGCTCGTCTTCATCTC        |
| revtrans20722073_1.5 | GATAGCCAGACCCCGTTTC         |
| revtrans20722073_2.3 | GTCCGTTCAAGTCGGAACAC        |
| revtrans20722073_2.5 | AAAACGCACAACGCAGAC          |
| revtrans20732074.3   | GGCCGGTAACTGTTTGAAGT        |

|                      |                       |
|----------------------|-----------------------|
| revtrans20732074.5   | CCTATGCTTGCCTTTCATGG  |
| revtrans20742075_1.3 | AGCTTCGTGGAAC TTCATGG |
| revtrans20742075_1.5 | GGCTTCGAGAATCTTGATCG  |
| revtrans20742075_2.3 | GTCATTTGCCGCTTTCCAT   |
| revtrans20742075_2.5 | GCCGGAAAGGGTTATGAAAT  |
| revtrans20752076_1.3 | CCCGCTTATCTGCAACATCT  |
| revtrans20752076_1.5 | ATGGGACGCATACGCTTG    |
| revtrans20752076_2.3 | ACTCGGATTGATGCAGGAAG  |
| revtrans20752076_2.5 | TGCACATTGACGATTGCAC   |
| revtrans20762077_1.3 | TCAATTGCCATTTTCGATCAG |
| revtrans20762077_1.5 | CCTCAATAAGGGCCTTTGC   |
| revtrans20762077_2.3 | GGAACACCGGAAGCCATC    |
| revtrans20762077_2.5 | ACATAGATCGTCGCGCTTG   |
| revtrans20772078_1.3 | TTCCGTGAAACCGACCTTAC  |
| revtrans20772078_1.5 | GGTCAGAACATGGGTCTTGC  |
| revtrans20772078_2.3 | CCGGAGAAGGGCTATCTTTC  |
| revtrans20772078_2.5 | CTGCGCATCGATGGTTTC    |
| revtrans20782079.3   | GCGCTGAAGGATACTCAAGG  |
| revtrans20782079.5   | TTAACAGAATCGCCGGAAC   |
| revtrans20792080_1.3 | GAGCGGATAGAGCATTTTCG  |
| revtrans20792080_1.5 | CATTCTGCCAGAAATCCAC   |
| revtrans20792080_2.3 | TGGAAAATGCGACAAAACAA  |
| revtrans20792080_2.5 | GGAGCGATCGTCTTGCAT    |

---

|                      |                                 |
|----------------------|---------------------------------|
| revtrans20802081_1.3 | CGACGCTTCTGATGTTCAAG            |
| revtrans20802081_1.5 | TTGGGATGCAACTGCATAAG            |
| revtrans20802081_2.3 | GAGCTTGCCGCCAATATG              |
| revtrans20802081_2.5 | GATTGCCGAGCTTTTCCAG             |
| exFAM-omp25          | CGTCGGCAGCAAAAGCGGTTCGCAGAGAACG |
| exFAM 2-omp25        | CAGCTATACTGGGGAGCTACTTCAACC     |
| exFAM2bvrR           | CGCAGAAGCGCCGTCGGTATAGGTTTCG    |
| exFAM-omp25b         | GCCTTTGCGCCAGTCGCAGCAACGAGAACG  |
| exFAM-omp3b          | GGTCCCTCCCATCATGTCTGGCTGCGAAAGC |
| exFAM-exoR           | GGCAAGTGCCAAGGTAAGGACCAAGCCTAG  |

---
