# Supplementary material for: The regulon of Brucella abortus two-component system BvrR/BvrS reveals the coordination of metabolic pathways required for intracellular life
Source: PubMed Central journal article supplement (PMC9491525; doi:10.1371/journal.pone.0274397), 2022-09-21
Supplement: pone.0274397.s003.pdf [file pone.0274397.s003.pdf]

**Supplementary Table 2.** Genomes used for  $\alpha$ -*Proteobacteria* phylogenetic reconstruction.

| <b>Strain</b>                                      | <b>Taxonomic Subgroup</b> | <b>Accession number</b> |
|----------------------------------------------------|---------------------------|-------------------------|
| <b>OUTGROUP</b>                                    |                           |                         |
| <i>Escherichia coli</i> K12                        | Gammaproteobacteria       | NC_000913               |
| <i>Geobacter sulfurreducens</i><br>PCA             | Betaproteobacteria        | NC_002939               |
| <i>Ralstonia solanacearum</i><br>GMI1000           | Deltaproteobacteria       | NC_003295               |
| <b>RHIZOBIALES</b>                                 |                           |                         |
| <i>Brucella abortus</i> 2308<br>Wisconsin          | Brucellaceae              | GCA_900095085.1         |
| <i>Brucella suis</i> str. 1330                     | Brucellaceae              | GCA_000007505.1         |
| <i>Ochrobactrum intermedium</i><br>LMG 3301        | Brucellaceae              | GCA_000182645.1         |
| <i>Agrobacterium tumefaciens</i><br>str. Ach 5     | Rhizobiaceae              | NZ_CP011246.1           |
| <i>Sinorhizobium meliloti</i> str.<br>RU11/01      | Rhizobiaceae              | NZ_CP021219.1           |
| <i>Bradyrhizobium japonicum</i><br>str. J5         | Bradyrhizobiaceae         | NZ_CP017637.1           |
| <i>Rodhospseudomonas</i><br><i>palustris</i> TIE-1 | Bradyrhizobiaceae         | NC_011004.1             |
| <i>Mesorhizobium loti</i> str.<br>TONO             | Phyllobacteriaceae        | NZ_AP017605.1           |
| <i>Bartonella quintana</i> str.<br>Toulouse        | Bartonellaceae            | NC_005955.1             |
| <i>Bartonella henselae</i> str. BM<br>1374165      | Bartonellaceae            | NZ_HG969191.1           |
| <b>CAULOBACTERALES</b>                             |                           |                         |
| <i>Caulobacter crescentus</i><br>NA1000            | Caulobacteraceae          | NC_011916.1             |
| <b>RICKETTSIALES</b>                               |                           |                         |
| <i>Rickettsia prowazeki</i> str.<br>RpGvF24        | Rickettsiaceae            | NC_017057.1             |
| <i>Rickettsia conorii</i> str. Malish<br>7         | Rickettsiaceae            | NC_003103.1             |

*Wolbachia pipientis* str. wPpe

Anaplasmataceae

GCA\_001752665.1

---
